# Supplementary material for: Functional Characterization of Macrolide Esterase from Cyanobacteria and Their Potential Dissemination Risk
Source: Research Square preprint supplement (doi:10.21203/rs.3.rs-7709107/v1), 2025-10-14

Supplementary material 1

The SDS-PAGE of the five recombinant proteins had different expressions for each protein, where OCA-1 was soluble expression. (A) Soluble fractions of NOD_1, PTE_1, LEP_1, OCA_1, and OCB_1 (lanes 2-6, from left to right). (B) Insoluble fractions of NOD_1, PTE_1, LEP_1, OCA_1, and OCB_1 (lanes 2-6, from left to right). M: Protein molecular weight markers (sizes indicated on the left).


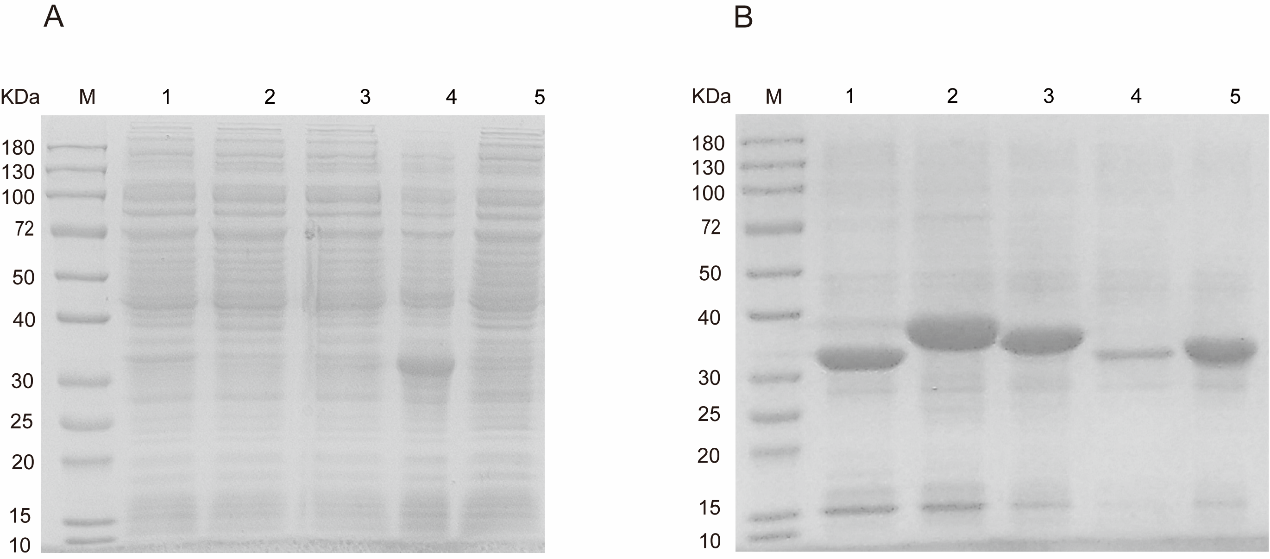


Supplementary material 2

2D structure of the binding pocket of ligand (Tylosin、Tilmicosin、 Tildipirosin、Spiramycin and Leucomycin A1) and OCA-1, analyzed by discover studio software, showing different types of interactions.


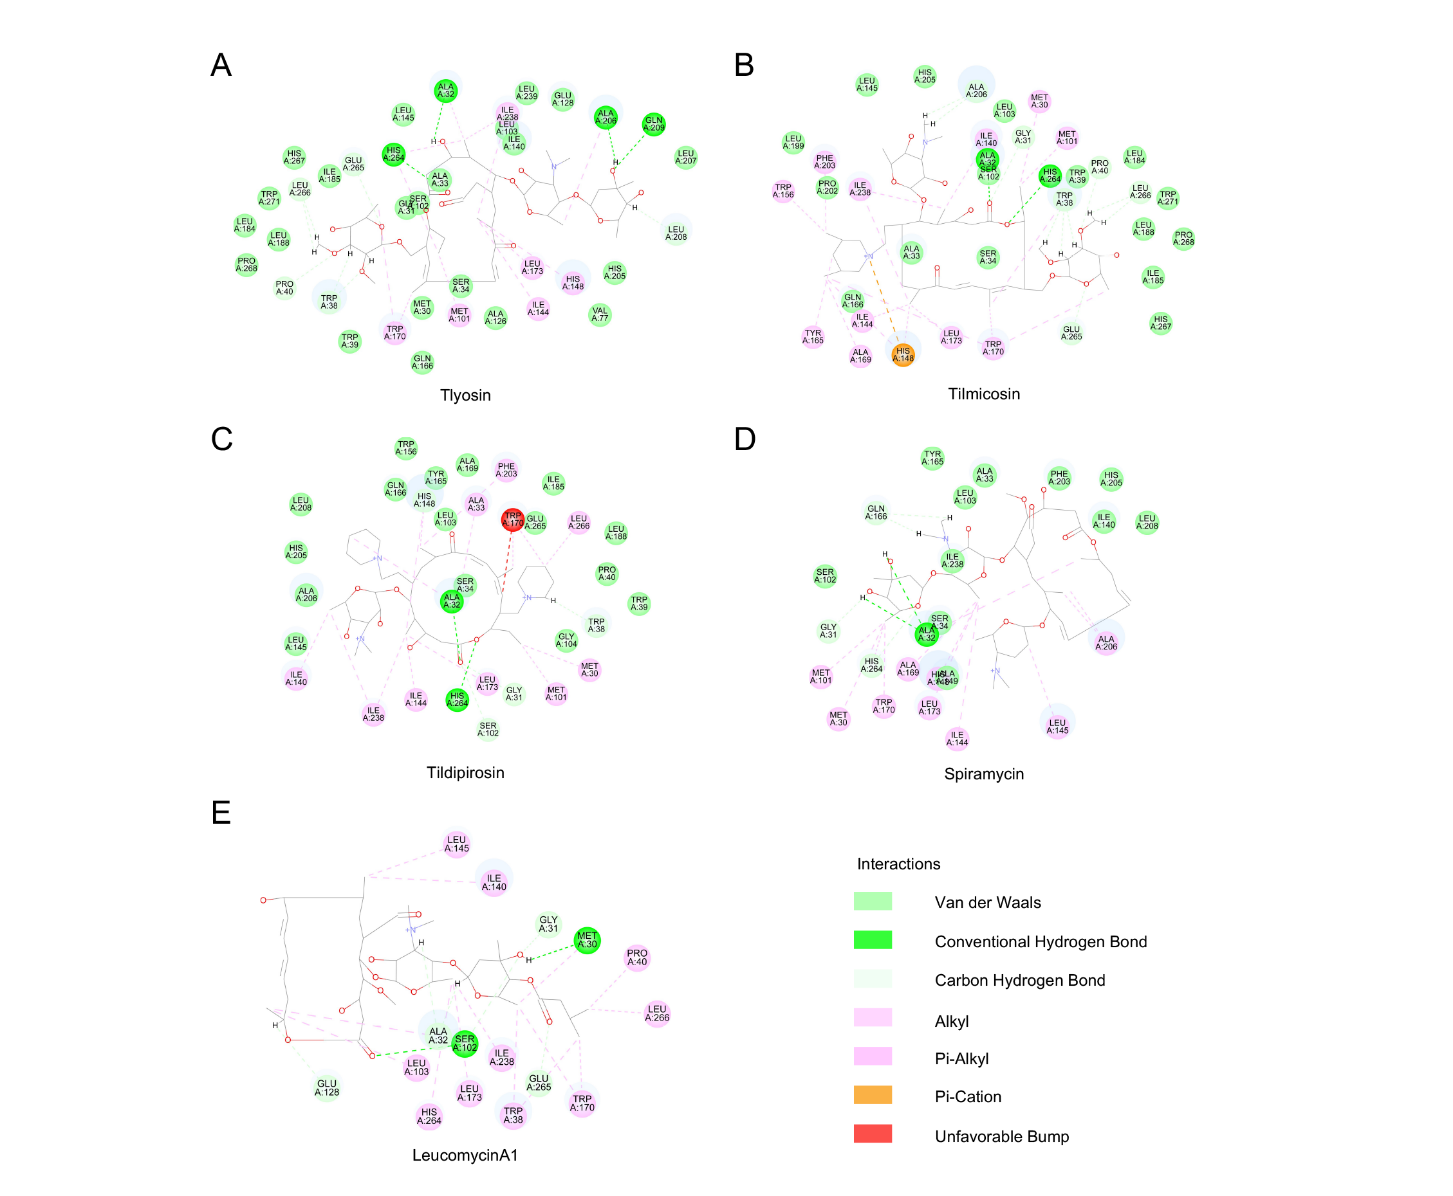


Supplementary material 3

3D structure of the distance of ligands (Tylosin、Tilmicosin、 Tildipirosin、Spiramycin and Leucomycin A1) and Ser102


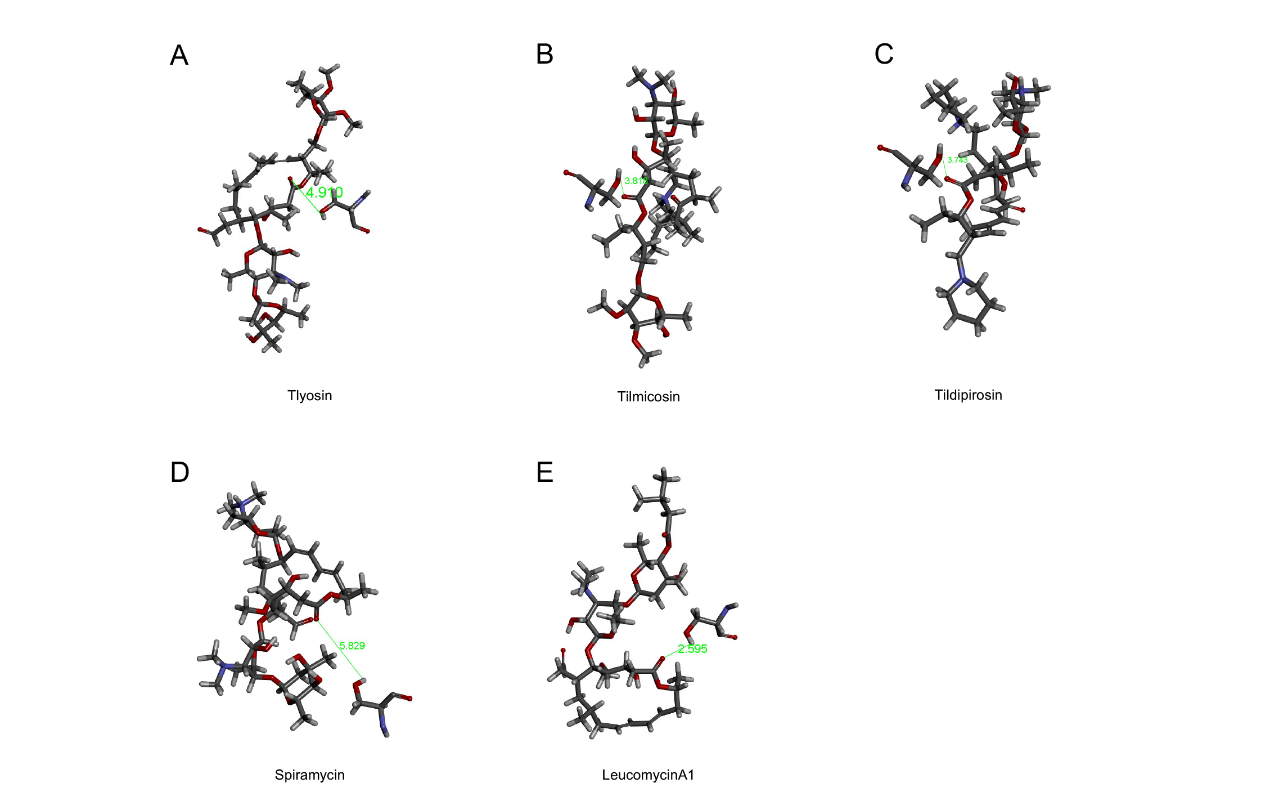

Supplement: Supplementary file 1 [file 901182b9da2c958db6d43aab.docx]
